# Supplementary material for: Sequencing of DISC1 Pathway Genes Reveals Increased Burden of Rare Missense Variants in Schizophrenia Patients from a Northern Swedish Population
Source: PLOS journal article supplement (doi:10.1371/journal.pone.0023450), 2011-08-11

**Figure S2:** Allele frequencies estimated from pooled DNA samples (as determined by GS-FLX sequencing) versus the actual frequencies (as determined by genotyping the individual samples) in the different pools. °: outlier (corresponding to rs13398676, in SZ pool 1)

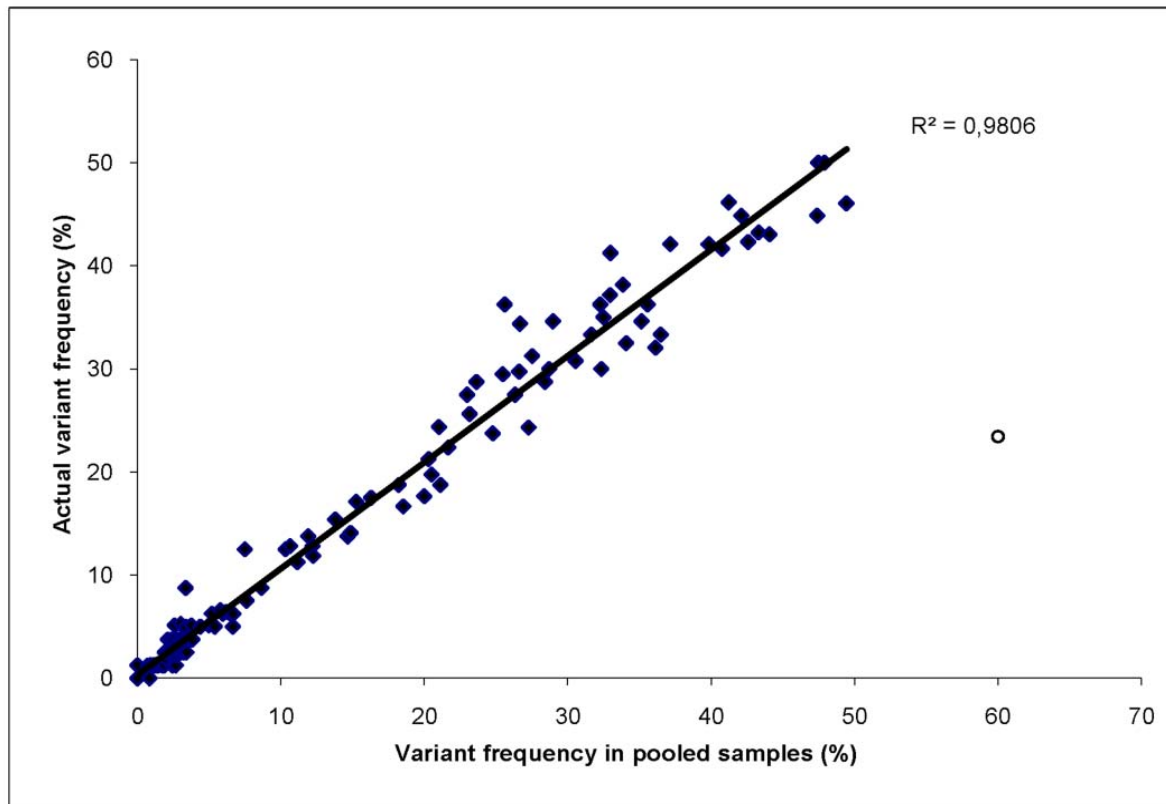

Supplement: S2 (10.1371/journal.pone.0023450.s002) [file journal.pone.0023450.s002]
