# Supplementary material for: Sequencing of DISC1 Pathway Genes Reveals Increased Burden of Rare Missense Variants in Schizophrenia Patients from a Northern Swedish Population
Source: PLOS journal article supplement (doi:10.1371/journal.pone.0023450), 2011-08-11
Supplement: S7 (10.1371/journal.pone.0023450.s007) [file journal.pone.0023450.s007]

**Table S3: Properties of amplicon subset selected for false negative rate estimation using Sanger sequencing**

| Property                                              | Full amplicon set       | Amplicon subset       |
|-------------------------------------------------------|-------------------------|-----------------------|
| <i># amplicons</i>                                    | 153                     | 14                    |
| <i>Distribution of variants/amplicon</i> <sup>b</sup> |                         |                       |
| # amplicons without variants                          | 95 (0.62) <sup>a</sup>  | 9 (0.64) <sup>a</sup> |
| # amplicons with variants                             | 58 (0.38) <sup>a</sup>  | 5 (0.36) <sup>a</sup> |
| <i># variants</i> <sup>b</sup>                        | 77 (0.50) <sup>a</sup>  | 7 (0.50) <sup>a</sup> |
| <i># amplicons with low read count</i> <sup>c</sup>   | 10 (0.065) <sup>a</sup> | 1 (0.07) <sup>a</sup> |
| <i>Average read count</i>                             | 1505                    | 1308                  |
| <i># screened bases</i>                               | 33864                   | 3111                  |

As the subsample was only sequenced in patients, data are shown for the patient pools only (excluding control-specific variants)

<sup>a</sup> Absolute number (relative to the number of amplicons)

<sup>b</sup> Includes both coding and non-coding variants (quality score  $\geq 20$ )

<sup>c</sup> < 500 reads/amplicon in both patient pools (i.e. <12.5 reads/individual)
